# Supplementary material for: Faecal microbiota transplantation protects against radiation‐induced toxicity
Source: PubMed Central journal article supplement (PMC5376756; doi:10.15252/emmm.201606932), 2017-02-27
Supplement: EMMM-9-448-s001.pdf [file EMMM-9-448-s001.pdf]

**Appendix “Faecal microbiota transplantation protects against radiation-induced toxicity” by Cui et al.**

|                           |         |
|---------------------------|---------|
| Appendix Figure Legends   | pp 2-3  |
| Appendix Figures S1 to S7 | pp 4-10 |
| Appendix Table S1         | pp 11   |

## **Appendix Figure Legends**

### **Appendix Figure S1. The intestinal bacterial flora profile between male and female mice is different**

A, B The Shannon diversity index and  $\beta$  diversity of intestinal bacteria in male (A) and female (B) mice were examined by 16S high throughput sequencing after 6 weeks of housing,  $n = 4$  per group. Statistically significant differences are indicated: Student's *t*-test.

C, D The WBC counts in PB were assessed in saline-treated, ampicillin-treated, and streptomycin-treated male and female mice after 6.5 Gy TBI.  $n = 6$ . Significant differences are indicated shown relative to the saline-treated group: \*\*\* $P < 0.005$ ; Student's *t*-test.

E The difference in the intestinal bacterial structure at the genus level between male and female mice was assessed by 16S high throughput sequencing,  $n = 4$ .

### **Appendix Figure S2. FMT retains the gene expression profile of the small intestine after radiation**

A Significantly enriched GO terms (top 30) induced by sex-mismatched FMT in male mice.

B Significantly enriched GO terms (top 30) induced by sex-mixed FMT in male mice.

C, D Heat map of genes significantly up- and down-regulated (red and green, respectively) in small intestine tissue from sex-mismatched (C) and sex-mixed (D) FMT male mice compared with those of the controls. Each row represents a single gene.

### **Appendix Figure S3. FMT retains the gene expression profile of the small intestine after radiation**

A Significantly enriched GO terms (top 30) induced by sex-mismatched FMT in female mice.

B Significantly enriched GO terms (top 30) induced by sex-mixed FMT in female mice.

C, D Heat map of genes significantly up- and down-regulated (red and green, respectively) in small intestine tissue from sex-mismatched (C) and sex-mixed (D) FMT female mice compared with those of the controls. Each row represents a single gene.

### **Appendix Figure S4. Sex-matched FMT alters the lncRNA expression which related to immunity in male mice**

Coding–non-coding gene co-expression network was analyzed in male mice. The green spots represent mRNAs and the yellow spots represent lncRNAs. Red lines represent a positive interaction between transcripts and blue lines represent a negative interaction.

**Appendix Figure S5. Sex-matched FMT alters the lncRNA expression which related to metabolism in male mice**

Coding–non-coding gene co-expression network was analyzed in male mice. The green spots represent mRNAs and the yellow spots represent lncRNAs. Red lines represent a positive interaction between transcripts and blue lines represent a negative interaction.

**Appendix Figure S6. Sex-matched FMT alters the lncRNA expression which related to metabolism in female mice**

Coding–non-coding gene co-expression network was analyzed in female mice. The green spots represent mRNAs and the yellow spots represent lncRNAs. Red lines represent a positive interaction between transcripts and blue lines represent a negative interaction.

**Appendix Figure S7. Sex-matched FMT alters the lncRNA expression which related to immunity in female mice**

Coding–non-coding gene co-expression network was analyzed in female mice. The green spots represent mRNAs and the yellow spots represent lncRNAs. Red lines represent a positive interaction between transcripts and blue lines represent a negative interaction.

Appendix Figure S1

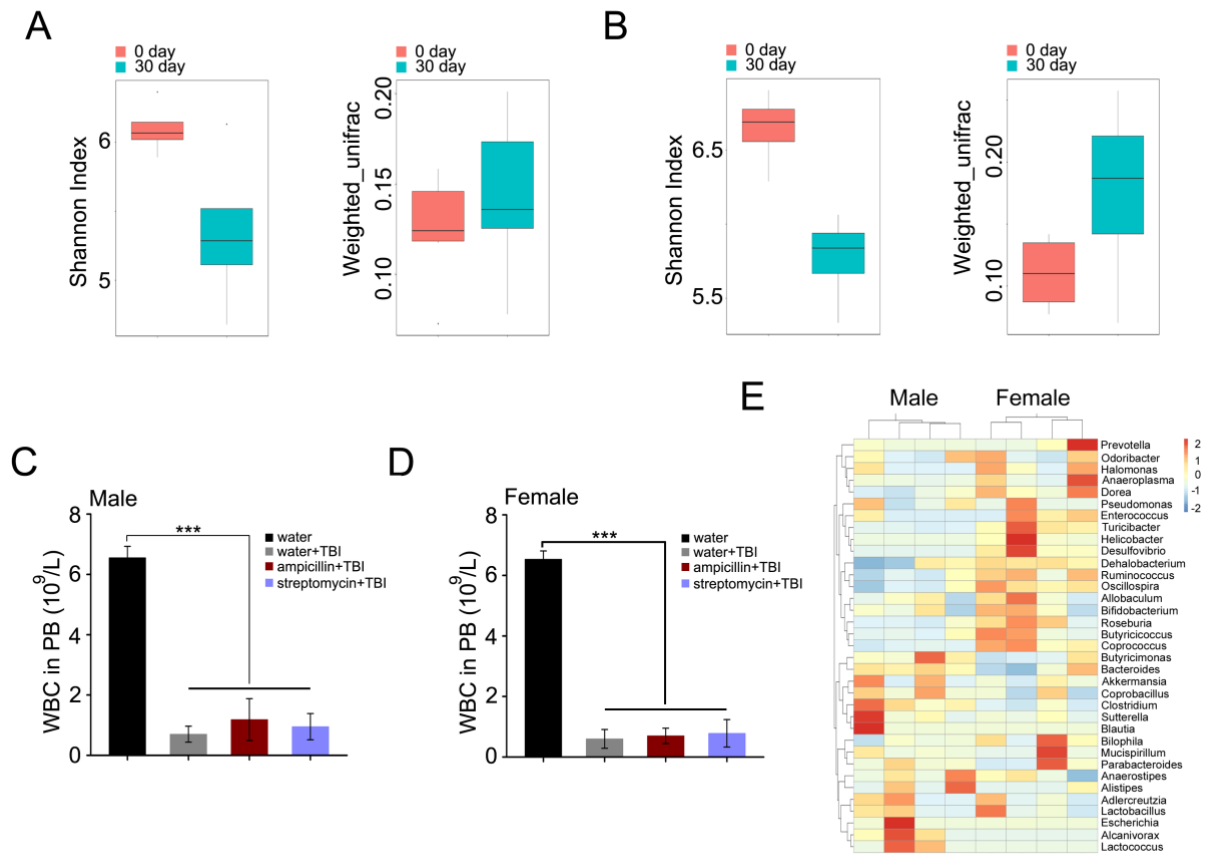

## Appendix Figure S2

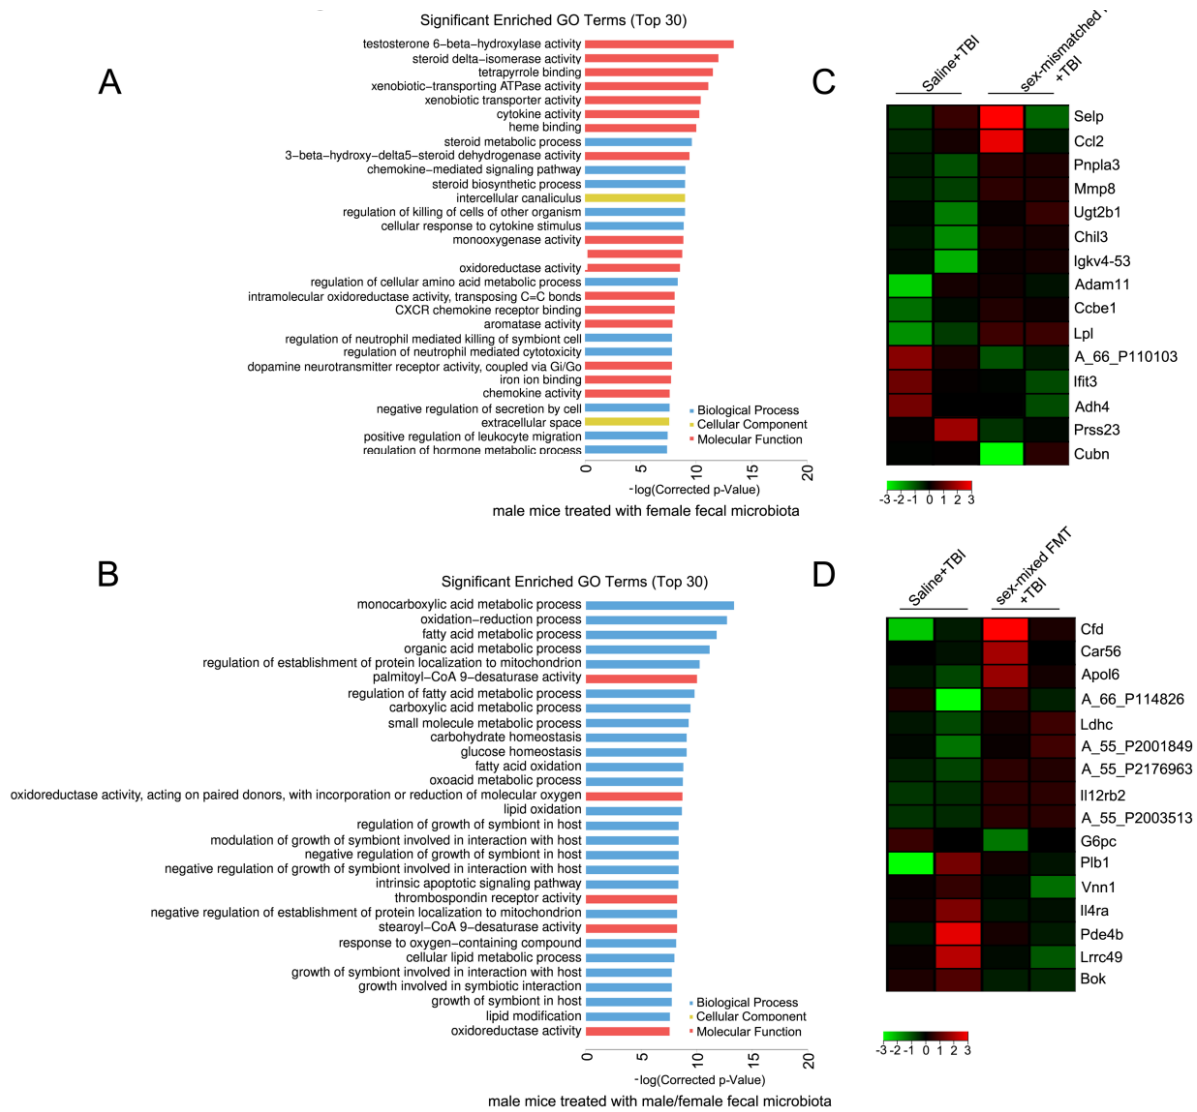

# Appendix Figure S3

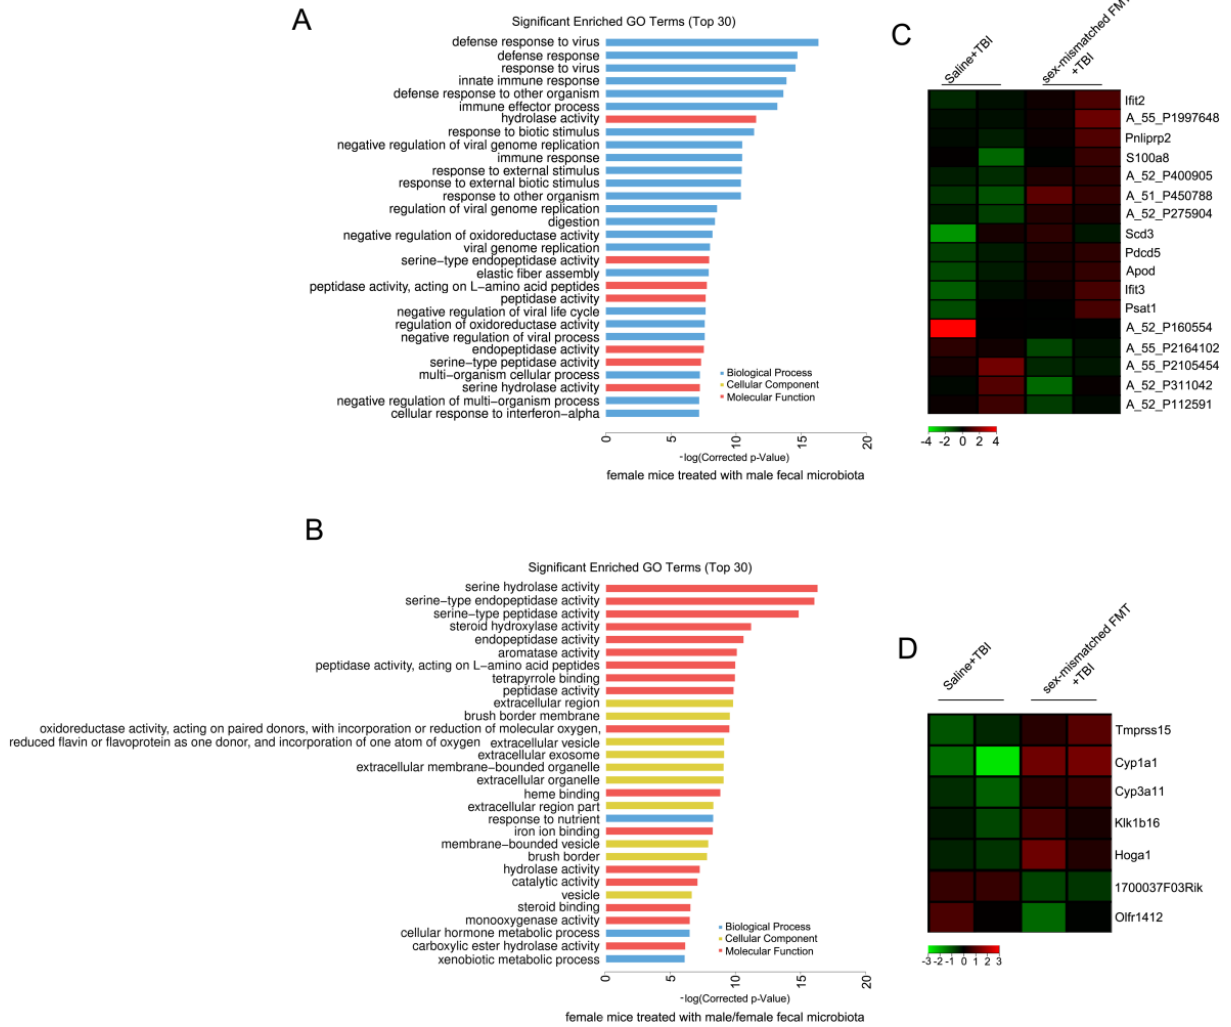

Appendix Figure S4

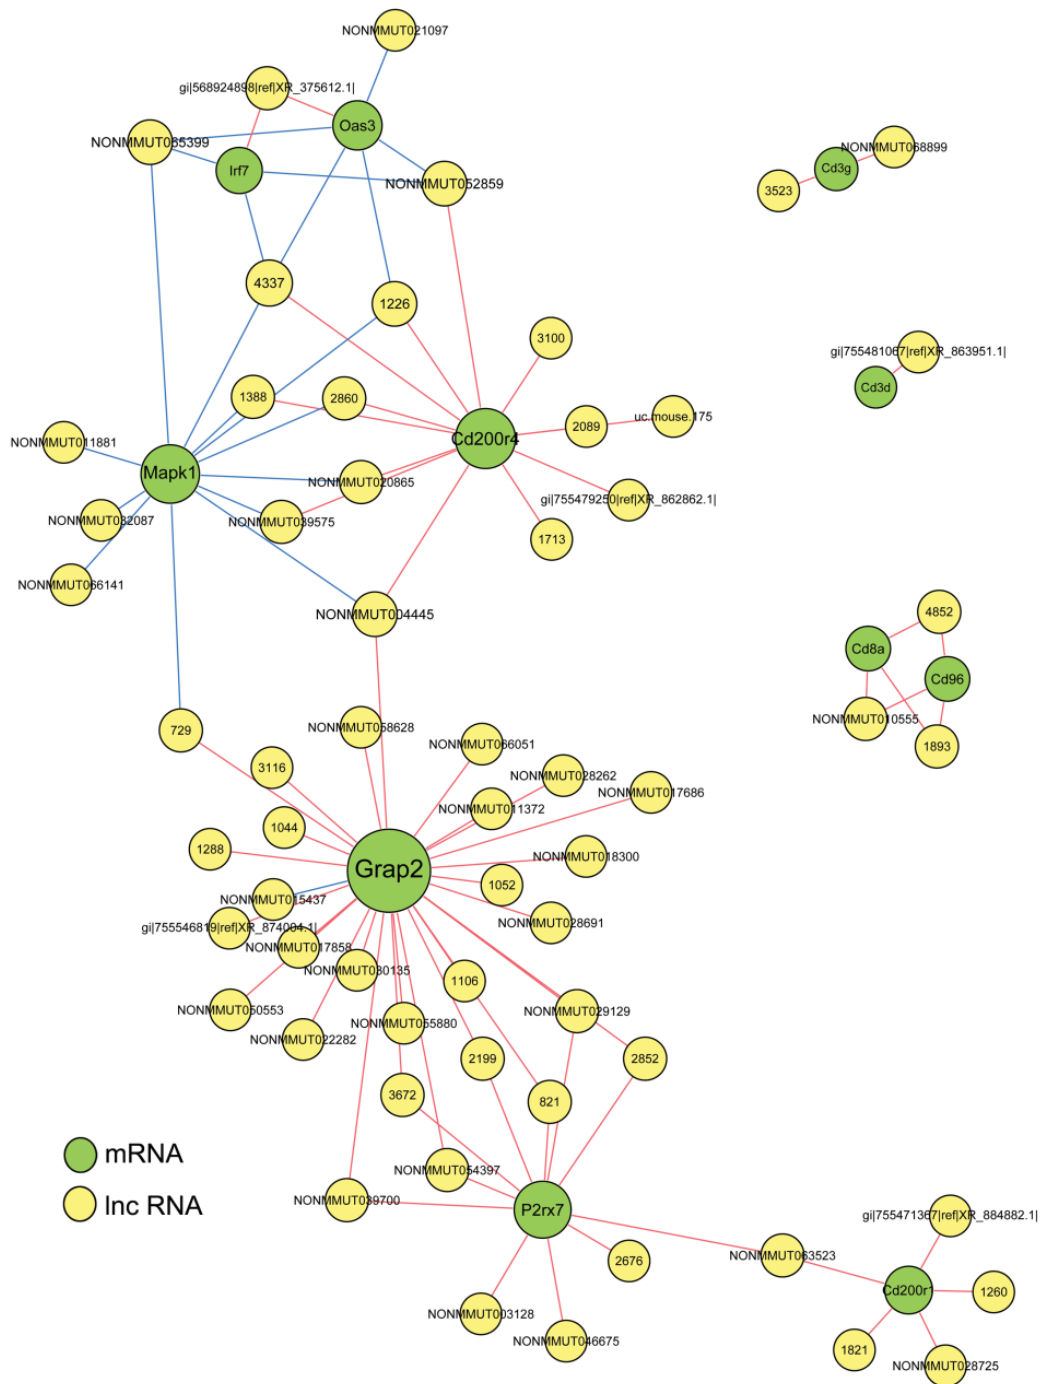

The alteration of lncRNA expression related to immunity in Male+TBI treated male mice

Appendix Figure S5

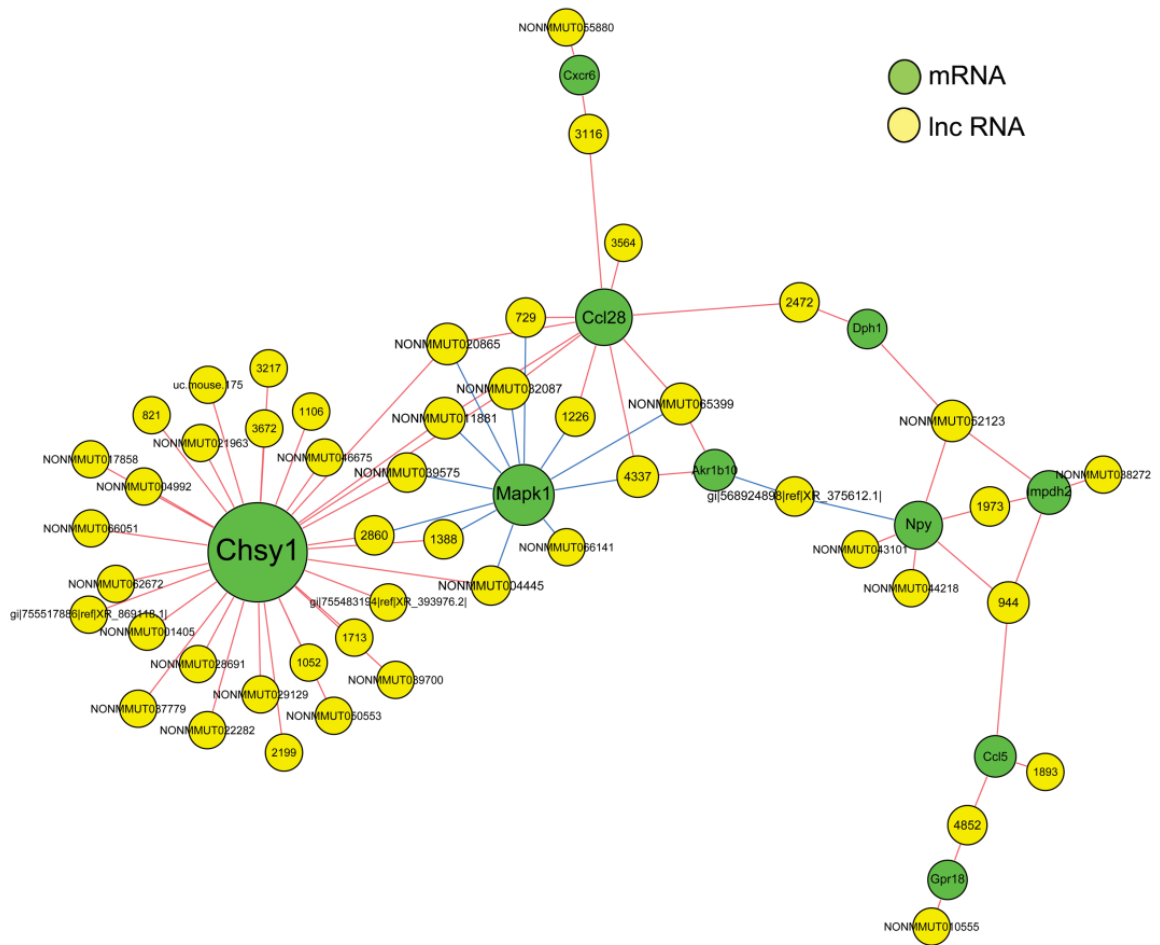

The alteration of lncRNA expression related to metabolism in Male+TBI treated male mice



## Appendix Figure S6

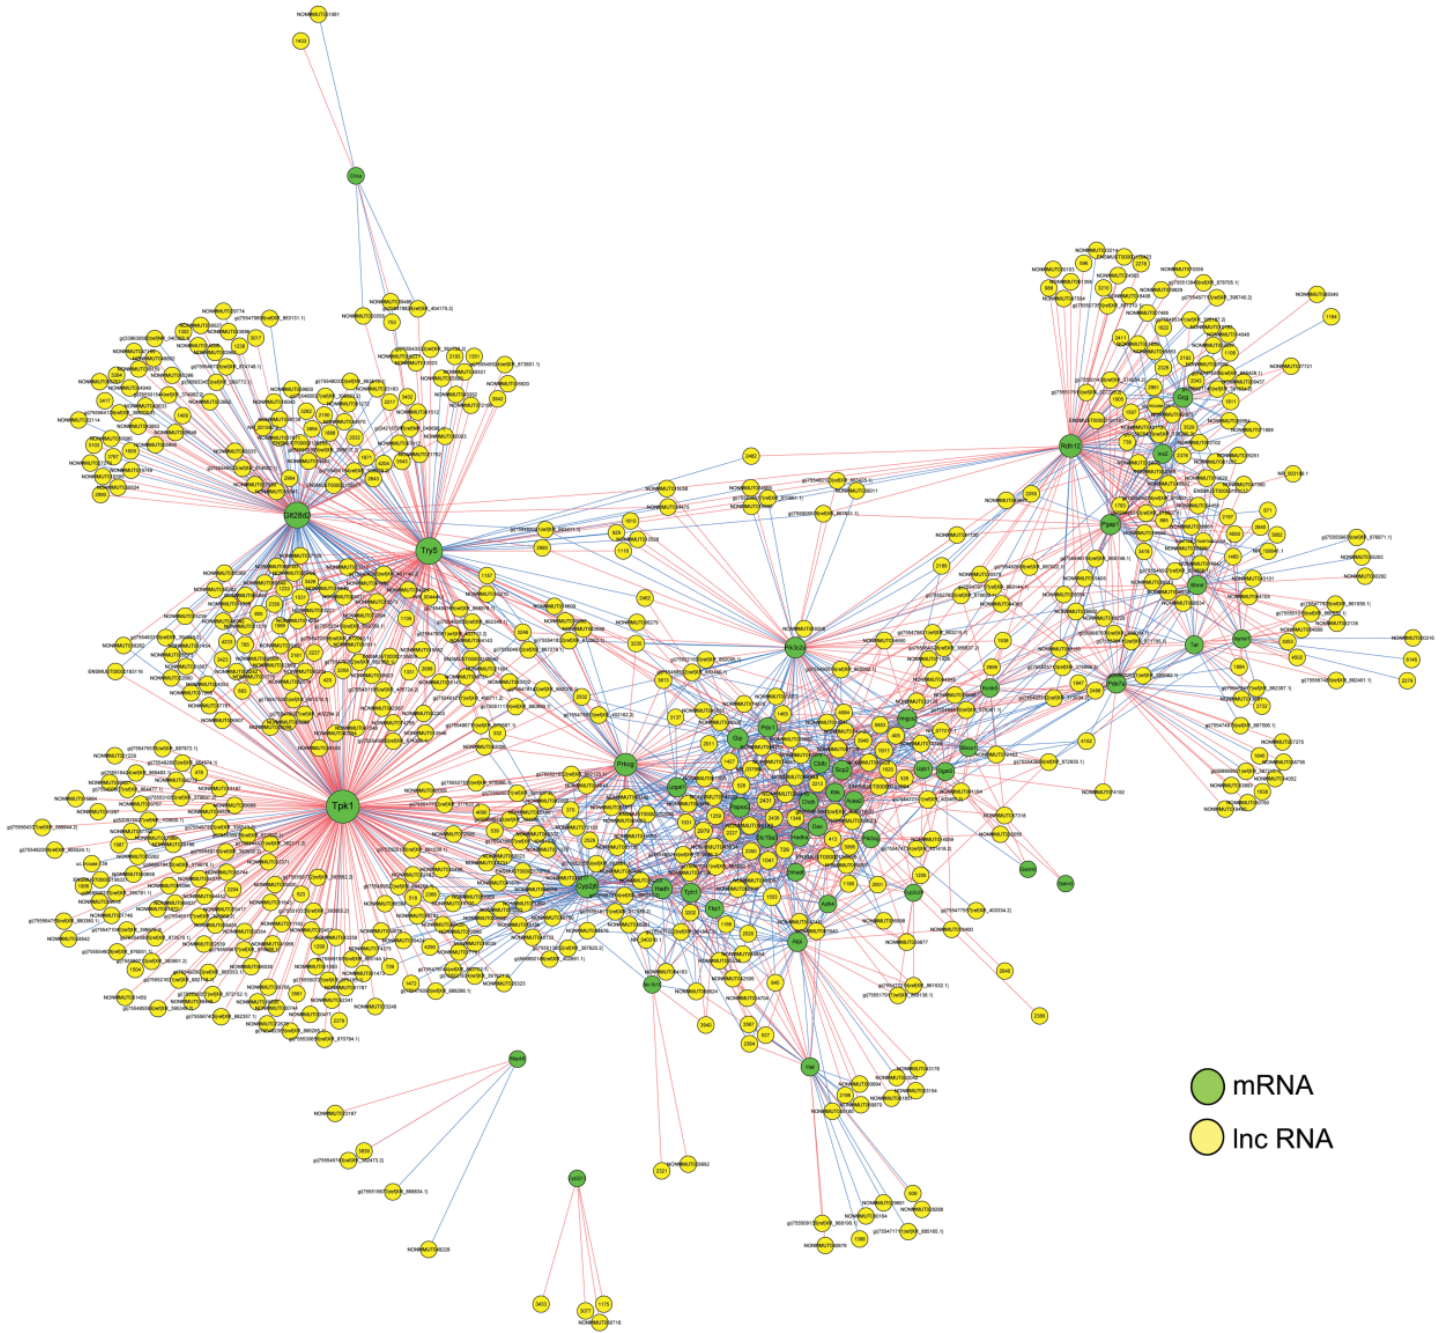

The alteration of lncRNA expression related to metabolism in Female+TBI treated female mice

Appendix Figure S7

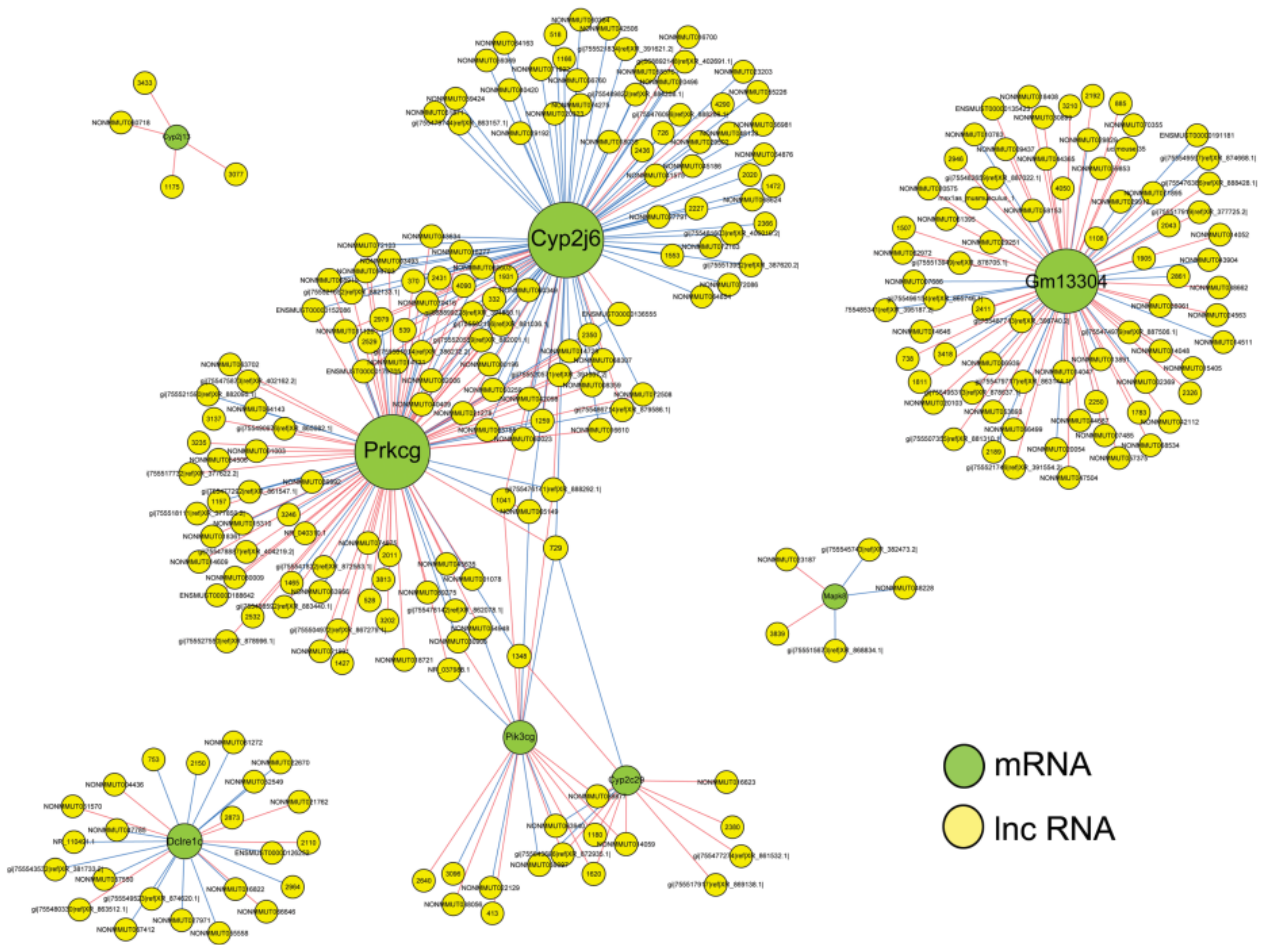

The alteration of lncRNA expression in related to immunity Female+TBI treated female mice

**Appendix Table S1.**

List of primers used in this paper.

| <b>Gene</b>                   | <b>Primer</b> | <b>Sequence (5'-3')</b> |
|-------------------------------|---------------|-------------------------|
| <b>Primers for PCR</b>        |               |                         |
| TFF3                          | forward       | CTGGCTAATGCTGTTGGT      |
|                               | reverse       | TTGTTACTACTGCTCCGATG    |
| VEGF                          | forward       | ACATCTTCAAGCCGTCCTGTG   |
|                               | reverse       | GTGCTGTAGGAAGCTCATCTC   |
| MDR1                          | forward       | TACGCCTACTATTACACCG     |
|                               | reverse       | CATCAAACCAGCCTATCTC     |
| Glut1                         | forward       | TATCCTGTTGCCCTTCTGC     |
|                               | reverse       | CCGACCCTCTTCTTTCATCTC   |
| pgk1                          | forward       | GGAAAACCTCCGCTTTCATGTA  |
|                               | reverse       | GCCTTCTGTGGCAGATTCACA   |
| Muc2                          | forward       | CCATTGAGTTTGGGAACATGC   |
|                               | reverse       | TTCGGCTCGGTGTTCCAGAG    |
| GAPDH                         | forward       | TGTTTCCTCGTCCCCTAGA     |
|                               | reverse       | CAATCTCCACTTTGCCACTG    |
| <b>Primers for sequencing</b> |               |                         |
| 515F                          |               | GTGCCAGCMGCCGCGGTAA     |
| 806R                          |               | GGACTACHVGGGTWTCTAAT    |
